# Supplementary material for: fMRI measurements of amygdala activation are confounded by stimulus correlated signal fluctuation in nearby veins draining distant brain regions
Source: PubMed Central journal article supplement (PMC4440210; doi:10.1038/srep10499), 2015-05-21
Supplement: srep10499-s2.pdf [file srep10499-s2.pdf]

# fMRI measurements of amygdala activation are confounded by stimulus correlated signal fluctuation in nearby veins draining distant brain regions

Roland N. Boubela<sup>abc†</sup>, Klaudius Kalcher<sup>abc†</sup>, Wolfgang Huf<sup>abc</sup>,  
Eva-Maria Seidel<sup>d</sup>, Birgit Derntl<sup>e</sup>, Lukas Pezawas<sup>f</sup>, Christian  
Našel<sup>g</sup>, Ewald Moser<sup>abh\*</sup>

<sup>a</sup>*Center for Medical Physics and Biomedical Engineering, Medical University of Vienna,  
Vienna, Austria*

<sup>b</sup>*MR Centre of Excellence, Medical University of Vienna, Vienna, Austria*

<sup>c</sup>*Department of Statistics and Probability Theory, Vienna University of Technology, Vienna,  
Austria*

<sup>d</sup>*Social, Cognitive and Affective Neuroscience Unit, Department of Basic Psychological  
Research and Research Methods, Faculty of Psychology, University of Vienna, Vienna, Austria*

<sup>e</sup>*Department of Psychiatry, Psychotherapy and Psychosomatics,  
RWTH Aachen University, Aachen, Germany*

<sup>f</sup>*Department of Psychiatry and Psychotherapy, Medical University of Vienna, Vienna, Austria*

<sup>g</sup>*Department of Radiology, Tulln Hospital, Karl Landsteiner University of Health Sciences,  
Tulln, Austria*

<sup>h</sup>*Brain Behaviour Laboratory, Department of Psychiatry,  
University of Pennsylvania Medical Center, Philadelphia, PA, USA*

<sup>†</sup>*Roland N. Boubela and Klaudius Kalcher contributed equally to this work.*

*\*Correspondence to ewald.moser@meduniwien.ac.at*

February 26, 2015

**Supplementary Video** Single-subject SWI and Faces-Forms Activation
